# Supplementary material for: COVID-19: Physical Activity and Quality of Life in a Sample of Swiss School Children during and after the First Stay-at-Home
Source: MDPI journal article supplement (doi:10.3390/ijerph19042231), 2022-02-16
Supplement: s1 [file s1]

## **Supplementary files for the manuscript**

COVID-19: Physical activity and quality of life of Swiss school children during and after stay-at-home

Valentin Benzing<sup>1</sup>, Patrice Gaillard<sup>1</sup>, David Scheidegger<sup>1</sup>, Alain Dössegger<sup>2</sup>, Claudio R. Nigg<sup>1</sup>, Mirko Schmidt<sup>1</sup>

<sup>1</sup>Institute of Sport Science, University of Bern, Bern, Switzerland

<sup>2</sup>Swiss Federal Institute of Sport SFISM, Magglingen, Switzerland

Correspondence concerning this article should be addressed to Valentin Benzing

Valentin Benzing, University of Bern, Bremgartenstrasse 145, 3012 Bern, Switzerland

E-mail: [valentin.benzing@ispw.unibe.ch](mailto:valentin.benzing@ispw.unibe.ch) (VB)

Tel: 0041-31-631-45-48

**Table S1.** Comparison of background characteristics between children participating at both measurement points ( $n = 36$ ) and those participating at the first measurement point only ( $n = 21$ ).

|                                           | <b>Children participating at both measurement points (<math>n = 36</math>)</b> | <b>Children participating at the first but not second measurement point (<math>n = 21</math>)</b> | <b><i>P</i></b> |
|-------------------------------------------|--------------------------------------------------------------------------------|---------------------------------------------------------------------------------------------------|-----------------|
|                                           | <i>Mean (SD)</i>                                                               | <i>Mean (SD)</i>                                                                                  |                 |
| Age [years]                               | 10.42 (1.11)                                                                   | 10.48 (1.78)                                                                                      | .891            |
| Socioeconomic status [0-13]               | 9.56 (1.73)                                                                    | 8.14 (2.15)                                                                                       | .009<br>*       |
| Height [cm]                               | 146.09 (10.68)                                                                 | 135.40 (29.98)                                                                                    | .173            |
| Weight [kg]                               | 37.53 (8.39)                                                                   | 35.94 (10.26)                                                                                     | .501            |
| BMI [kg/m <sup>2</sup> ]                  | 17.23 (2.51)                                                                   | 18.04 (3.78)                                                                                      | .397            |
|                                           | <i>n (%)</i>                                                                   | <i>n (%)</i>                                                                                      |                 |
| Overweight                                | 4 (11.1%)                                                                      | 3 (14.3%)                                                                                         | .480            |
| Sex [female]                              | 18 (50%)                                                                       | 16 (23.8%)                                                                                        | .052            |
| Swiss citizenship                         | 36 (100%)                                                                      | 21 (100%)                                                                                         |                 |
| Swiss citizenship parents                 | 34 (94.4%)                                                                     | 20 (95.2%)                                                                                        | .461            |
| School grade (1st/ 3rd/ 4th/ 5th/ 6th)    | 0 (0%)/ 11 (30.6%)/ 6 (16.6%)/ 13 (36.1%)/ 6 (16.6%)                           | 3 (14.3%)/ 3 (14.3%)/ 2 (9.5%)/ 9 (42.9%)/ 4 (19.0%)                                              | .123            |
| Membership in sports club                 | 32 (88.9%)                                                                     | 13 (65.0%)                                                                                        | .031<br>*       |
| <i>Living conditions</i>                  |                                                                                |                                                                                                   |                 |
| Residential area (urban, suburban, rural) | 2 (5.6%)/ 8 (22.2)/ 26 (72.2)                                                  | 1 (4.8%)/ 0 (0%)/ 20 (95.2%)                                                                      | .062            |
| Access to garden                          | 35 (97.2%)                                                                     | 20 (95.2%)                                                                                        | .695            |
| Nearby playground                         | 32 (88.9%)                                                                     | 19 (90.5%)                                                                                        | .851            |
| Pedestrian friendly neighborhood          | 33 (91.7%)                                                                     | 17 (81.0%)                                                                                        | .311            |

*Note.* *SD* = standard deviation; BMI = body mass index

*Significant differences between the two groups are indicated by an asterisk (\*  $p < .05$ ).*

**Figure S1.** Correlation between BMI and change in total score of HRQoL ( $r = -.334$ ,  $p = .013$ ) including overweight and normal weight children.

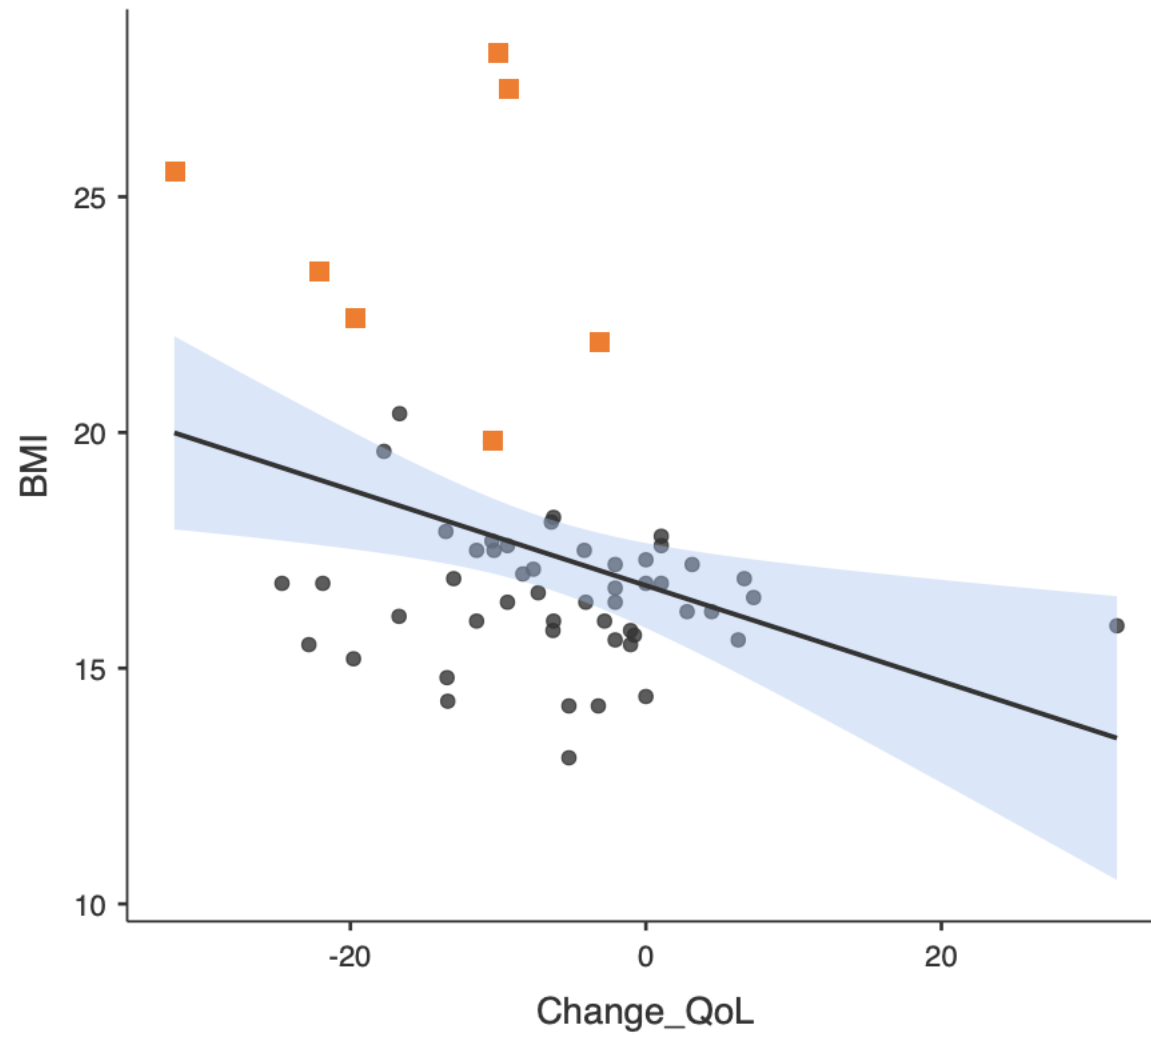

*Note.* The data depicted shows the mean value of imputed data sets for each participant. Change\_QoL = total score of KINDL<sup>R</sup>. Orange-colored rectangles = overweight children. Black-colored dots = normal weight children.

**Figure S2.**

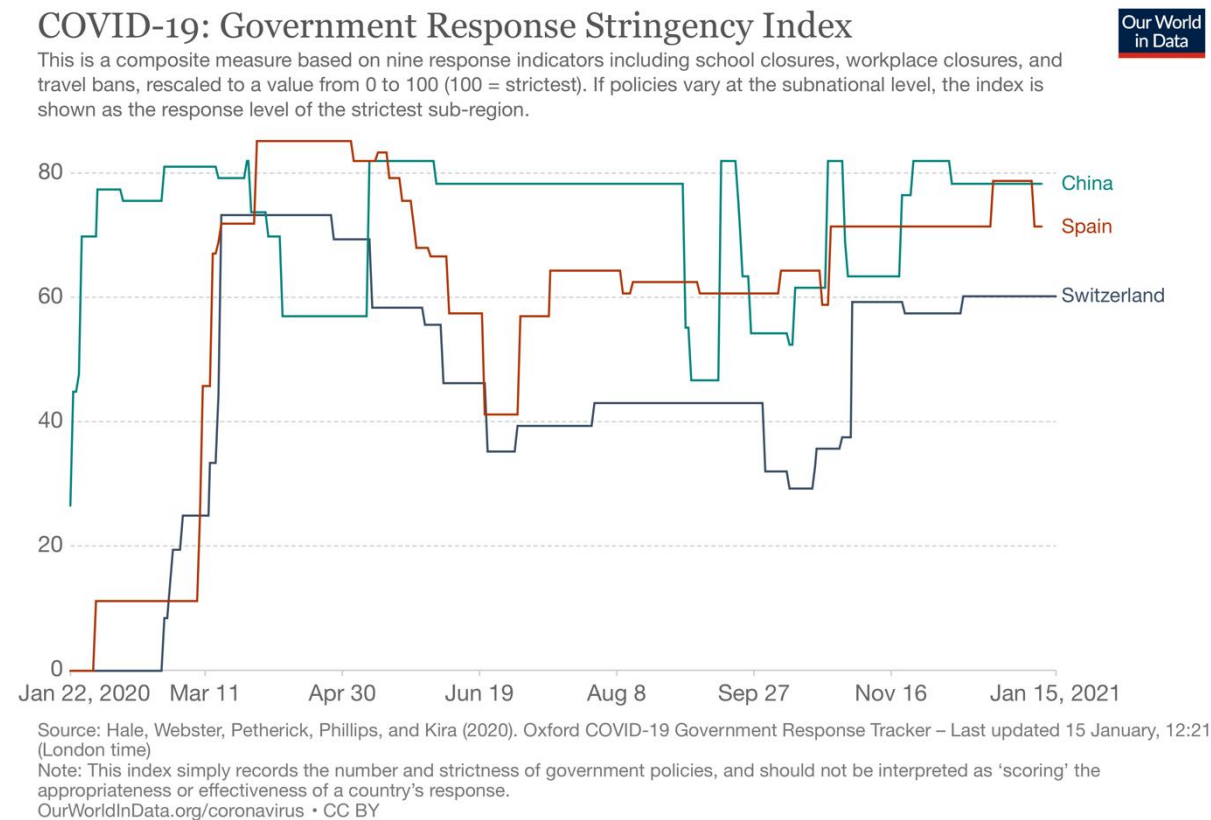

Source: <https://ourworldindata.org/grapher/covid-stringency-index>

**Figure S3.**

### COVID-19: Government Response Stringency Index

Our World  
in Data

This is a composite measure based on nine response indicators including school closures, workplace closures, and travel bans, rescaled to a value from 0 to 100 (100 = strictest). If policies vary at the subnational level, the index is shown as the response level of the strictest sub-region.

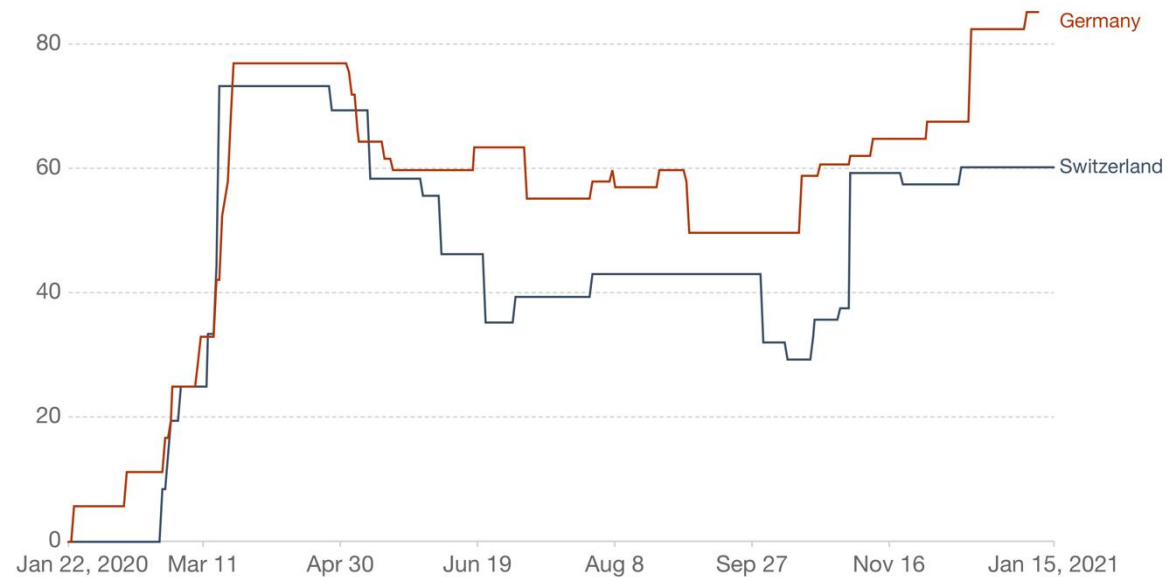

Source: Hale, Webster, Petherick, Phillips, and Kira (2020). Oxford COVID-19 Government Response Tracker – Last updated 15 January, 12:21 (London time)

Note: This index simply records the number and strictness of government policies, and should not be interpreted as 'scoring' the appropriateness or effectiveness of a country's response.

OurWorldInData.org/coronavirus • CC BY

Source: <https://ourworldindata.org/grapher/covid-stringency-index>
